# Supplementary material
Source: publisher figshare collection journal article supplement (https://karger.figshare.com/ndownloader/files/37560853)
Supplement: Supplementary file 1 [file 37560853]

Supplementary Table 7.MMC placement subanalysis: Summary of the most common (reported in ≥3% of patients in the overall population) procedure- and/or device-related non-serious AEs and all SAEs in the study eye over 2 years of follow-up (PP population).

|  | Group 1  (*n* = 36) | Group 2  (*n* = 25) |
| --- | --- | --- |
| Non-serious AE, *n* (%) |  |  |
| Investigator-reported increased IOPa | 9 (25.0) | 10 (40.0) |
| Hyphema | 8 (22.2) | 7 (28.0) |
| Transient hypotony (IOP <6 mmHg at any time)b | 4 (11.1) | 6 (24.0) |
| Keratitisc | 4 (11.1) | 3 (12.0) |
| Corneal ulcer | 1 (2.8) | 3 (12.0) |
| Drug allergy | 2 (5.6) | 1 (4.0) |
| Tube touching iris | 3 (8.3) | 0 |
| Ocular irritation | 2 (5.6) | 0 |
| Conjunctival hemorrhage | 2 (5.6) | 0 |
| Macular edema | 0 | 2 (8.0) |
| Retinal complicationd | 0 | 2 (8.0) |
| Suture bleed/suture complication | 2 (5.6) | 0 |
| SAE, *n* (%) |  |  |
| Bleb leak | 1 (2.8) | 0 |
| Implant migration | 1 (2.8) | 0 |
| Investigator-reported increased IOP | 0 | 1 (4.0)e |

aFollowing the event of non-serious increased IOP, 7 patients required postoperative needling (Group 1, *n* = 4; Group 2, *n* = 3), 6 patients received medication (Group 1, *n* = 1; Group 2; *n* = 5), 5 patients received medication/needling (Group 1, *n* = 4; Group 2, *n* = 1), 3 patients required no intervention (Group 2 only), and 1 patient underwent surgical procedure/needling (Group 2 only). bCases of hypotony resolved after 17.2 ± 11.7 days. cDefined as small defects in the corneal epithelium. dDialysis, flap tears, detachment, decompression, or proliferative retinopathy. eFollowing the event of serious increased IOP, 1 patient underwent surgical procedure. AE, adverse event; IOP, intraocular pressure; MMC, Mitomycin C; PP, per-protocol; SAE, serious adverse event.
